# Supplementary material for: Wound healing in aged skin exhibits systems-level alterations in cellular composition and cell-cell communication
Source: PubMed Central journal article supplement — Cell Rep. Author manuscript; Available in PMC 2023 Feb 6. (PMC9901190; doi:10.1016/j.celrep.2022.111155), 2022-08-02
Supplement: NIHMS1866797-supplement-1.pdf [file NIHMS1866797-supplement-1.pdf]

**Cell Reports, Volume 40**

**Supplemental information**

**Wound healing in aged skin exhibits systems-level  
alterations in cellular composition  
and cell-cell communication**

**Remy Vu, Suoqin Jin, Peng Sun, Daniel Haensel, Quy Hoa Nguyen, Morgan Dragan, Kai Kessenbrock, Qing Nie, and Xing Dai**

# SUPPLEMENTARY FIGURES

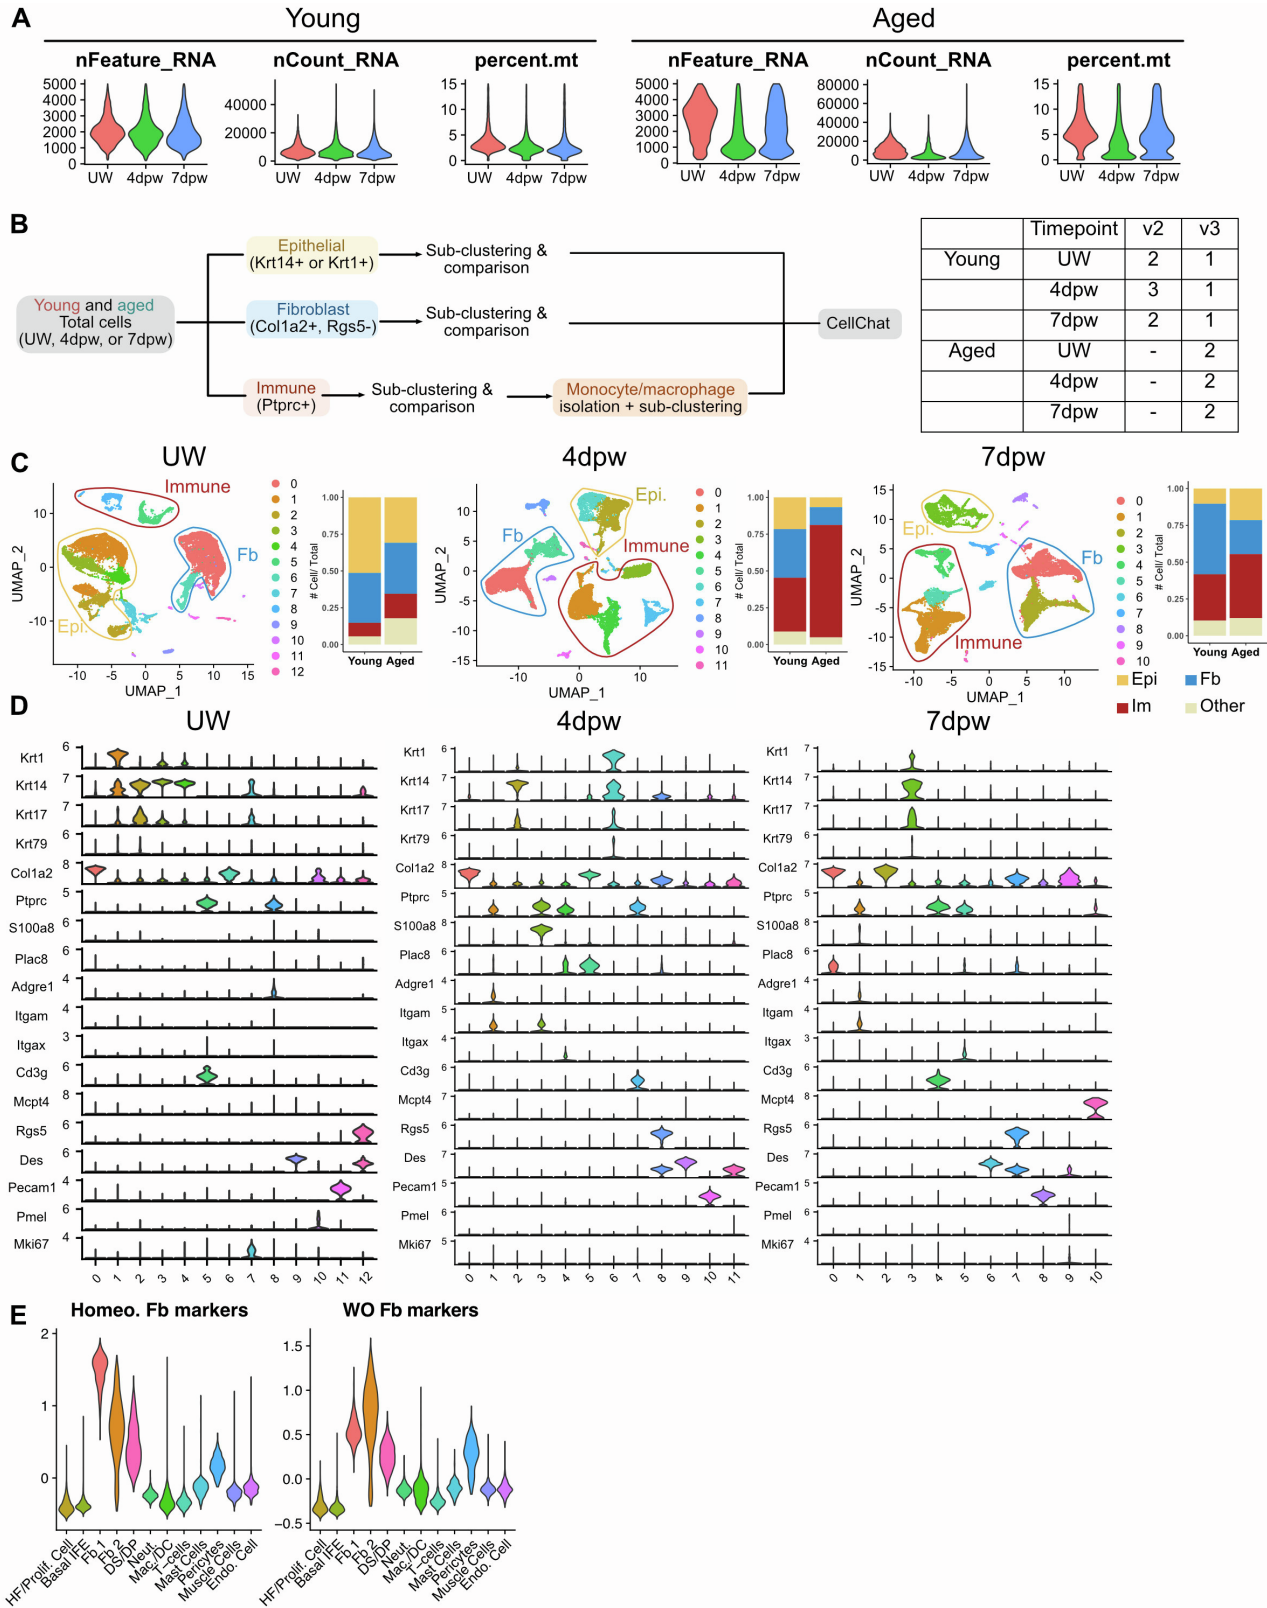

**Figure S1. Identification of major cell populations in UW, 4dpw and 7dpw wound samples using young+aged combined datasets. Related to Figures 1, 2, and 3.**

- A. Quality control metrics to eliminate dead and low-quality cells. Cells with nFeatures > 5000 or < 200 or percent mitochondrial genes > 15% were eliminated from analysis.
- B. Data analysis flowchart (left) and table showing the number of young and aged animals used for each wound timepoint and 10X kit chemistry (right).
- C. UMAP and proportion of major cell populations present in the young+aged combined datasets and used for subsequent subclustered analysis.
- D. Expression of marker genes identifying major cell populations in the young+aged combined datasets in C.
- E. Gene scoring analysis of all cell types in aged UW, 4dpw and 7dpw samples for top 100 marker genes of homeostasis-associated and wound-induced fibroblast clusters in aggregated young samples.

Data presented in this figure include both v2 and v3 samples.

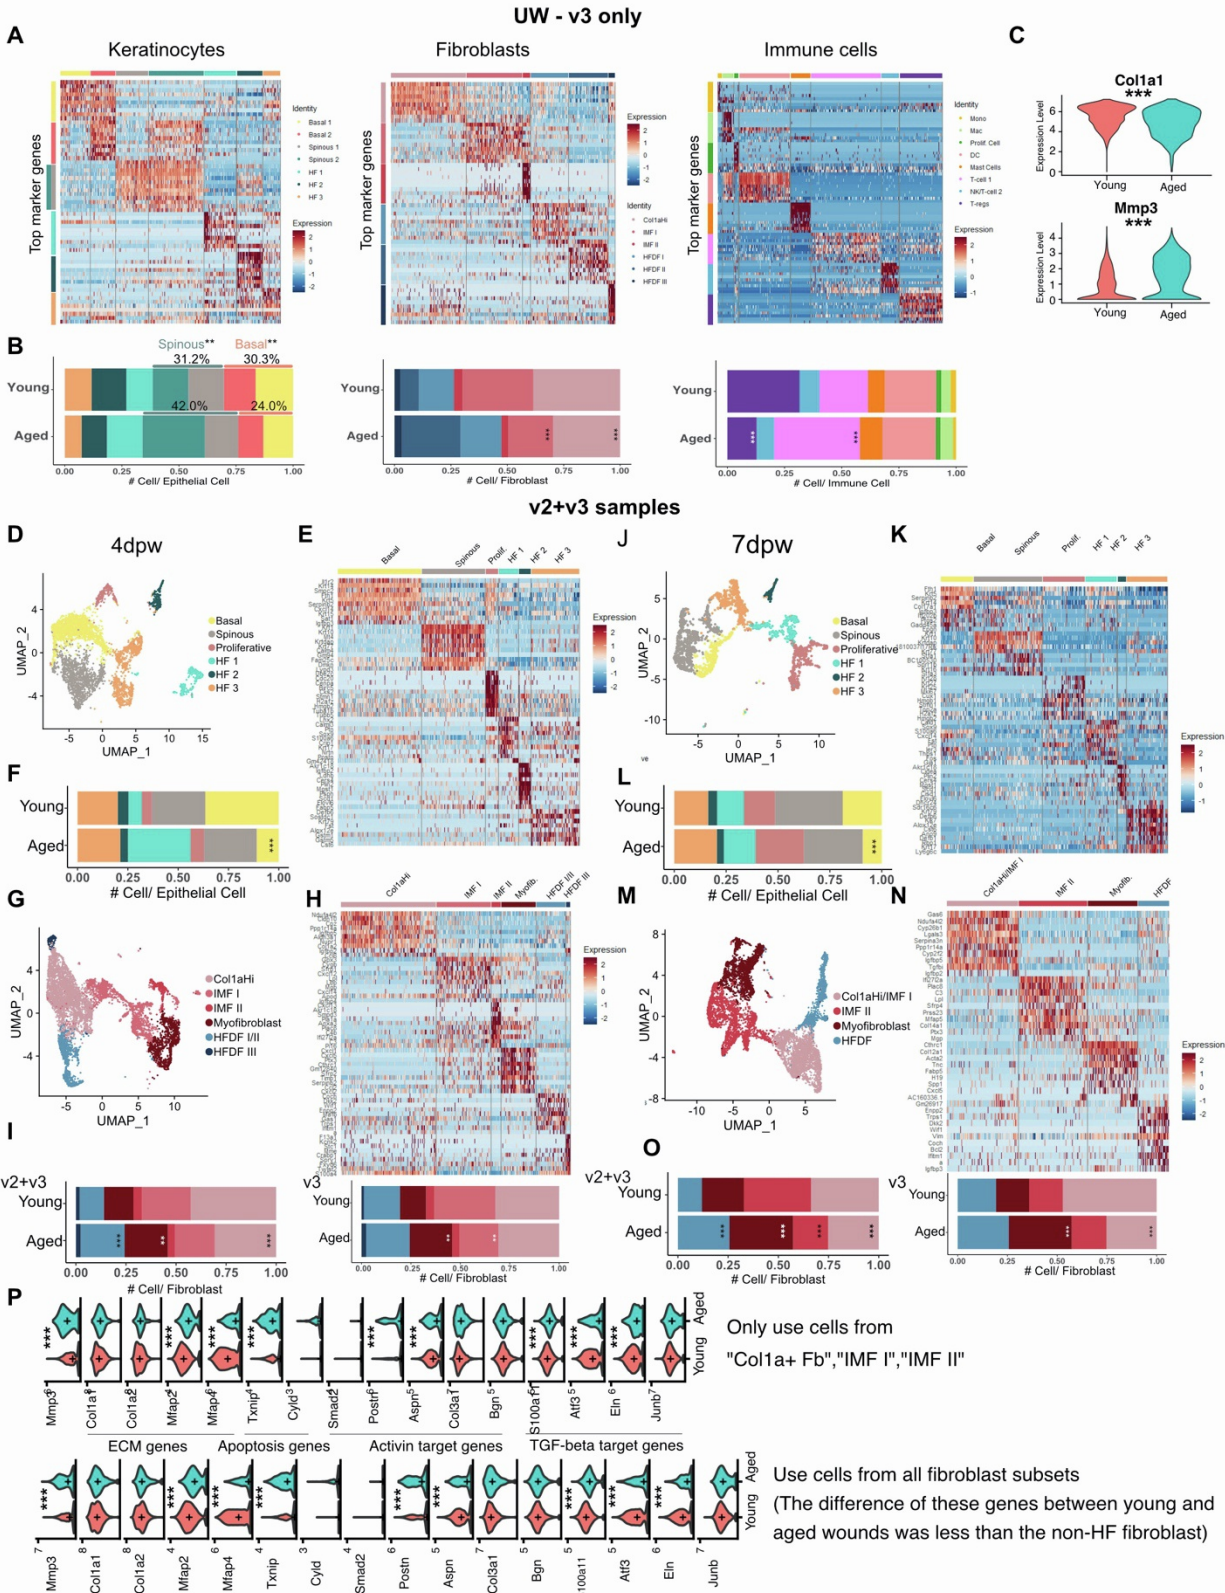

**Figure S2. Heterogeneity of epidermal cells and fibroblasts in young and aged skin during homeostasis, and at 4dpw and 7dpw. Related to Figures 1, 6 and 7.**

(A-C) v3-only young and aged samples. (D-O) v2+v3 young and aged samples.

- A. Heatmap showing expression of top 10 marker genes found using v2+v3 data in each epithelial, fibroblast, and immune cell subpopulation in v3-only aggregated young+aged UW samples.
- B. v3-only data corresponding to v2+v3 data in Figure 1D-E (epithelial cells), 1G-H (fibroblast), and 1L-M (immune cells).
- C. v3-only data corresponding to v2+v3 data in Figure 1I.
- D. UMAP of epithelial cells present in the aggregated young+aged combined datasets at 4dpw.
- E. Heatmap of top 10 marker genes for each epithelial subpopulation in D.
- F. Proportion of each epithelial subpopulation out of the total epithelial population in D.
- G. UMAP of fibroblasts present in the aggregated young+aged combined datasets at 4dpw.
- H. Heatmap of top 10 marker genes for each fibroblast subpopulation in G.
- I. Proportion of each fibroblast subpopulation out of the total fibroblast population in G.
- J. UMAP of epithelial cells present in the aggregated young+aged combined datasets at 7dpw.
- K. Heatmap of top 10 marker genes for each epithelial subpopulation in J.
- L. Proportion of each epithelial subpopulation out of the total epithelial population in J.
- M. UMAP of fibroblasts present in the aggregated young+aged combined datasets at 7dpw.
- N. Heatmap of top 10 marker genes for each fibroblast subpopulation in M.
- O. Proportion of each fibroblast subpopulation out of the total fibroblast population in M.

P. Violin plots showing expression of the indicated genes in fibroblasts of young vs. aged skin.

$p$ -values were calculated using the `prop.test` function in R (B, F, L, I, O) or Wilcoxon rank sum test (C, P). \*\*\* $p < 0.001$ , \*\*  $p < 0.01$ .

**A** 4dpw - v3

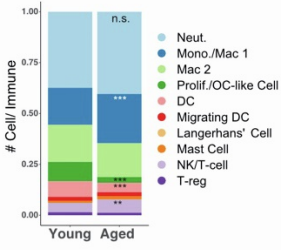

**B** v3

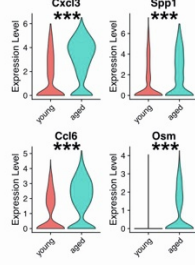

**C** 7dpw -v2+v3

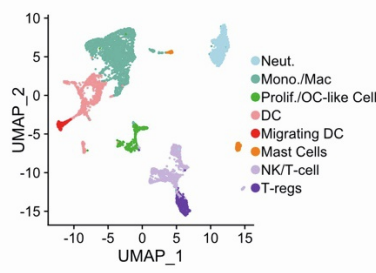

**D** 7dpw -v2+v3

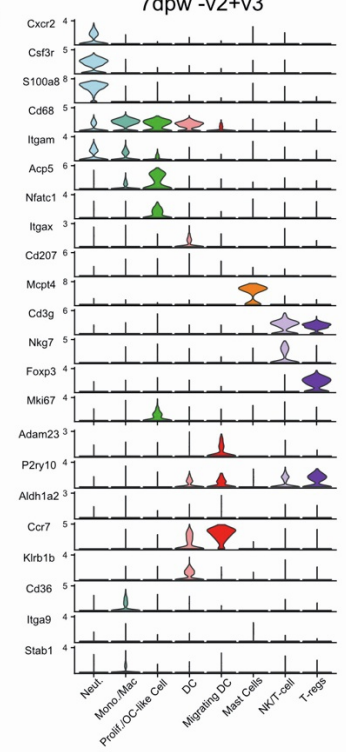

**E** 7dpw

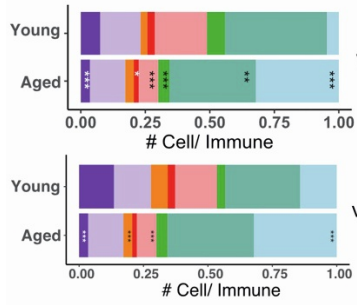

**F**

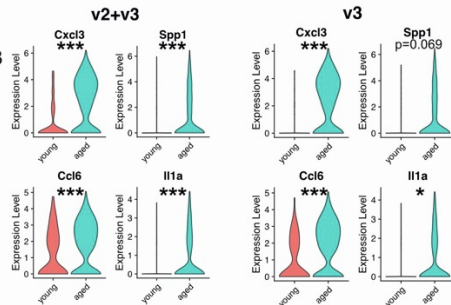

**Figure S3. Differential immune cell heterogeneity in young vs. aged skin wounds at 7dpw.**

**Related to Figure 3.**

- A. v3-only data corresponding to v2+v3 data in Figure 3B.
- B. v3-only data corresponding to v2+v3 data in Figure 3D. Full list of differentially expressed genes is included in Table S4.
- C. UMAP of immune cell populations present in aggregated young+aged skin wound samples at 7dpw (v2+v3).
- D. Marker genes used for identification of immune cell populations at 7dpw in C.
- E. Population proportion of each immune cell type in C. Both v2+v3 (top) and v3-only (bottom) results are shown.
- F. Expression of the indicated genes in neutrophils from young vs. aged 7dpw skin. Full list of differentially expressed genes is included in Table S4.

*p*-values were calculated using the prop.test function in R (A, E) or Wilcoxon rank sum test (B,

F). \*\*\* $p < 0.001$ , \*\*  $p < 0.01$ , \*  $p < 0.05$ .



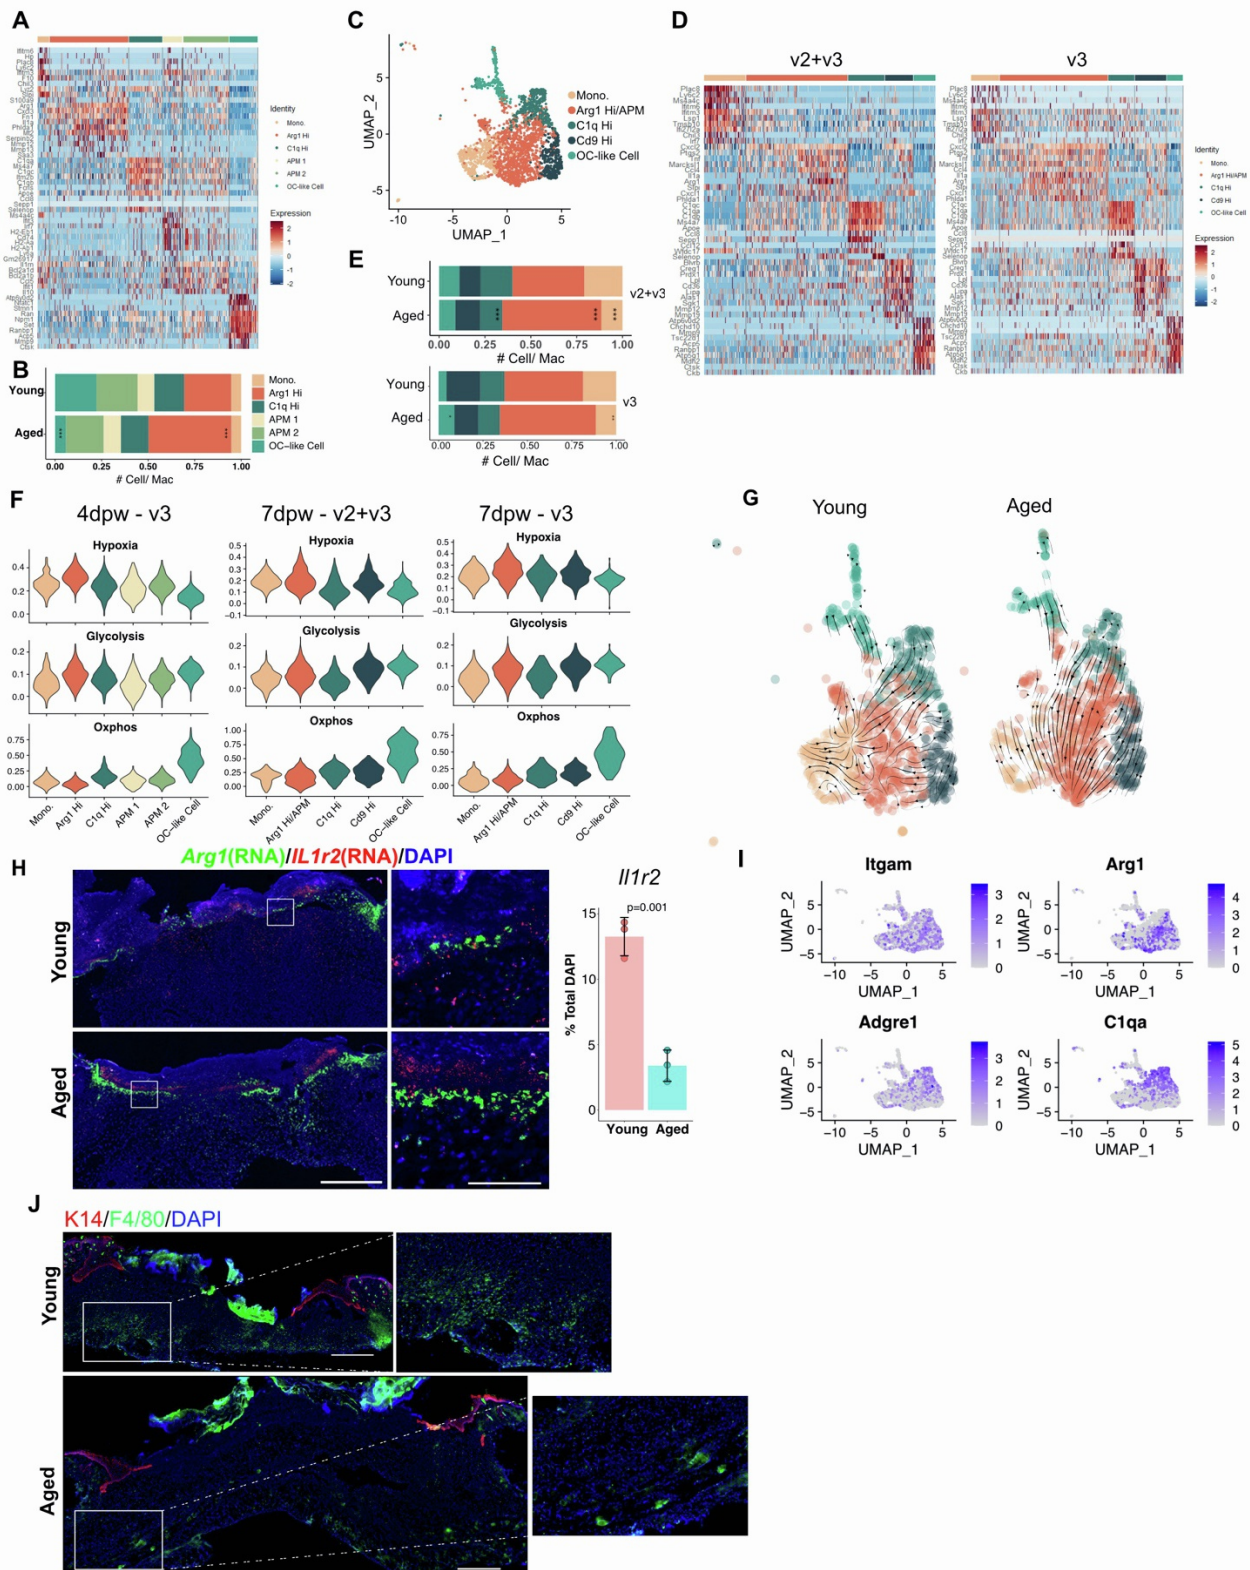

**Figure S4. Differential macrophage heterogeneity in young vs. aged skin wounds at 4dpw and 7dpw. Related to Figure 4.**

- A. v3-only data corresponding to v2+v3 data in Figure 4B.
- B. v3-only data corresponding to v2+v3 data in Figure 4C.
- C. UMAP of macrophage subpopulations present in young+aged skin wounds at 7dpw (v2+v3).
- D. Heatmap of top 10 differentially expressed marker genes in C. v3-only heatmap of the same 10 markers is shown on the right.
- E. Population proportion of each immune cell type in C. Corresponding v3-only data is shown at the bottom.
- F. Gene scoring analysis of 4dpw and 7dpw macrophage subpopulations for hypoxia-, glycolysis-, and oxidative phosphorylation-associated signatures using v2+v3 or v3-only young and aged samples.
- G. RNA velocity analysis of macrophages from young and aged skin wounds at 7dpw (v2+v3).
- H. RNAScope data showing spatial distribution of *Arg1* and *Il1r2* transcripts in young and aged skin wounds at 4dpw. DAPI stains the nuclei. Scale bars: 500  $\mu$ m in low-magnification image (left); 100  $\mu$ m in high-magnification images (right). Quantification of *Il1r2*<sup>+</sup> cells per total DAPI-stained nuclei in young and aged skin wound beds is shown on the right (n=3 pairs). Bar graphs represent mean $\pm$ SD.
- I. Feature plots showing expression of *Itgam*, *Arg1*, *Adgre1*, and *C1qa*, in macrophage populations of young+aged skin wound samples at 7dpw (v2+v3).
- J. Immunofluorescence of K14 and F4/80 proteins in young and aged skin wounds at 4dpw. DAPI stains the nuclei. Scale bars: 500  $\mu$ m.

$p$ -values were calculated using the `prop.test` function in R (B, E) or unpaired two-tailed Student's t-test (H). \*\*\* $p < 0.001$ , \*\*  $p < 0.01$ , \*  $p < 0.05$ .

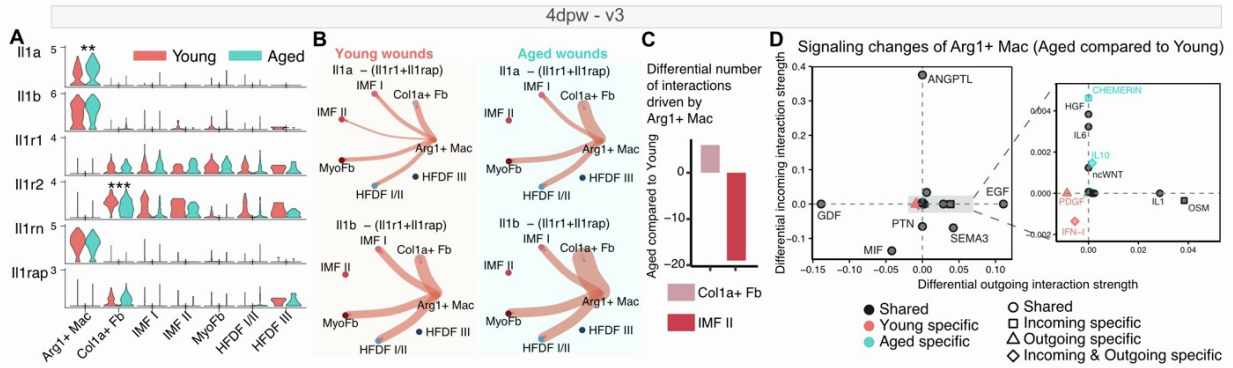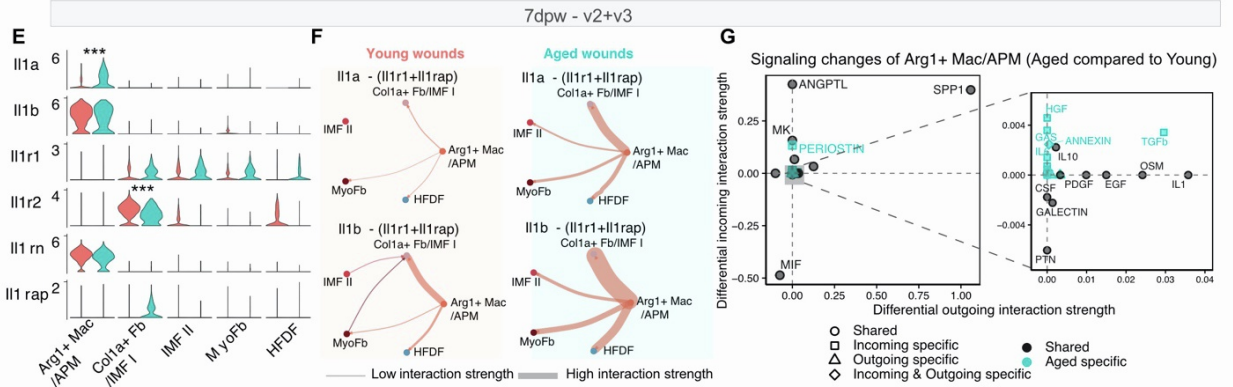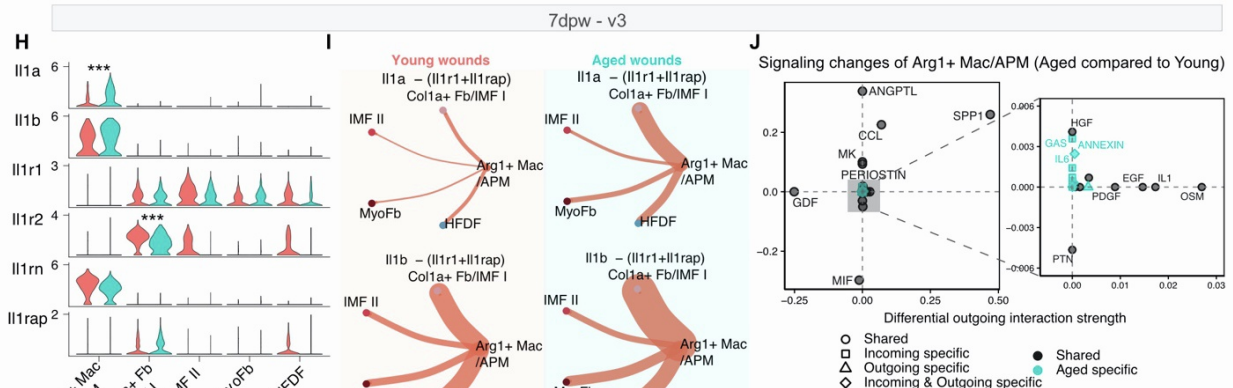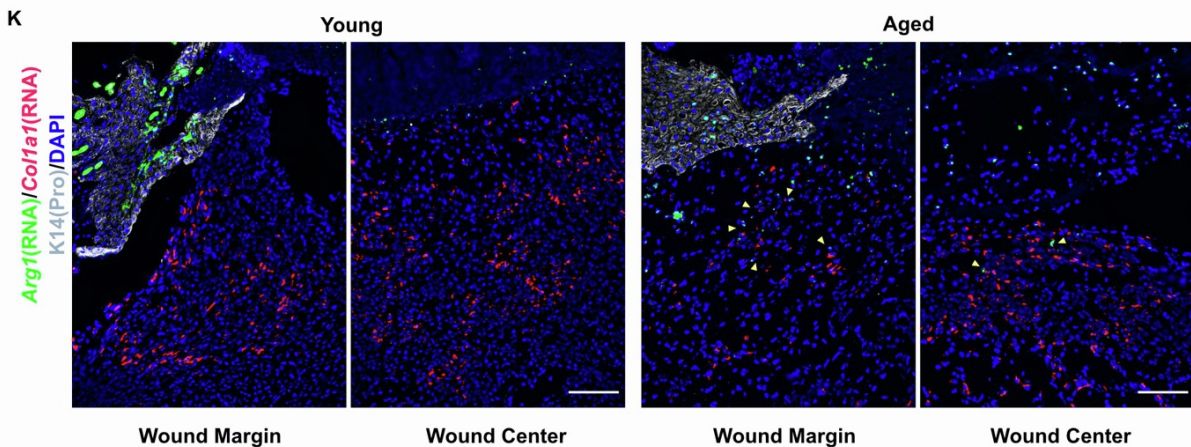

**Figure S5. Macrophage-mediated signaling in young and aged skin wounds. Related to Figure 5.**

A-D: v3-only analysis using young and aged skin wound data at 4dpw.

- A. v3-only data corresponding to v2+v3 data in Figure 5D.
- B. v3-only data corresponding to v2+v3 data in Figure 5E.
- C. v3-only data corresponding to v2+v3 data in Figure 5F.
- D. v3-only data corresponding to v2+v3 data in Figure 5G.

E-G: v2+v3 analysis of *Arg1*<sup>Hi</sup> macrophage/APM-mediated signaling in young and aged skin wounds at 7dpw. See Figure 5 legends for additional information.

H-J: v3-only data corresponding to v2+v3 data in (E-G) above.

- K. RNAScope data showing spatial distribution of *Arg1* and *Coll1* transcripts in young and aged skin wounds at 4dpw. Scale bars: 100  $\mu$ m. Yellow arrowheads indicate instances of spatial proximity between *Arg1*<sup>+</sup> and *Coll1*<sup>+</sup> cells.

4dpw - v3

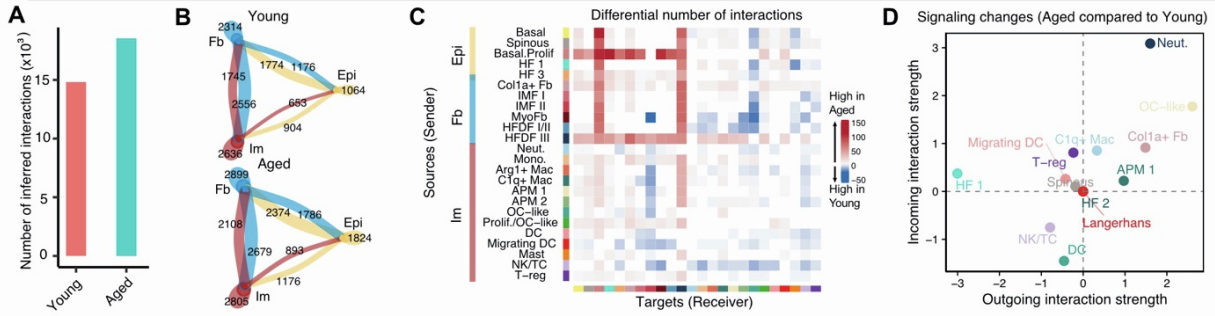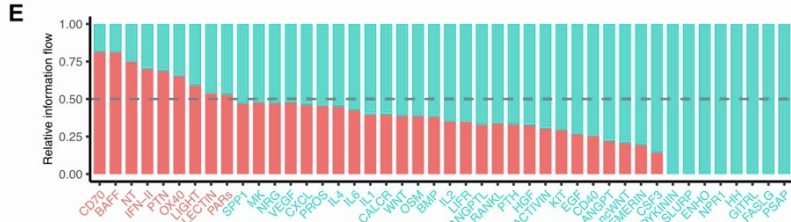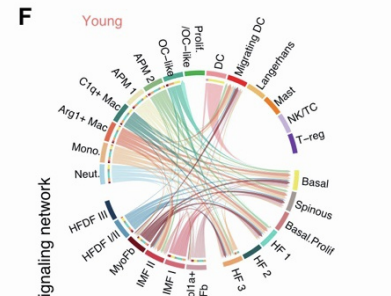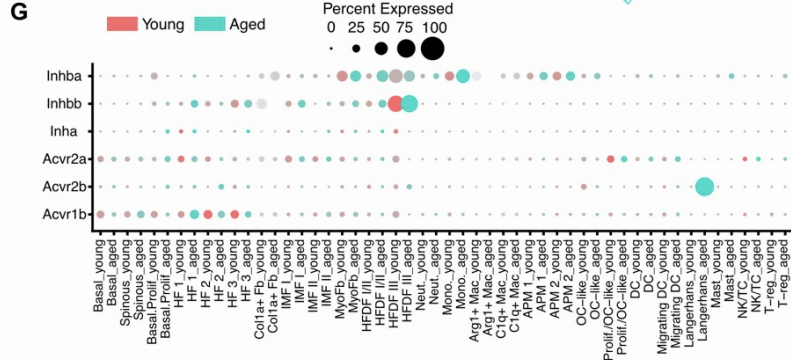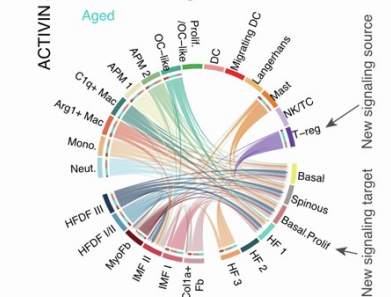

7dpw - v2+v3

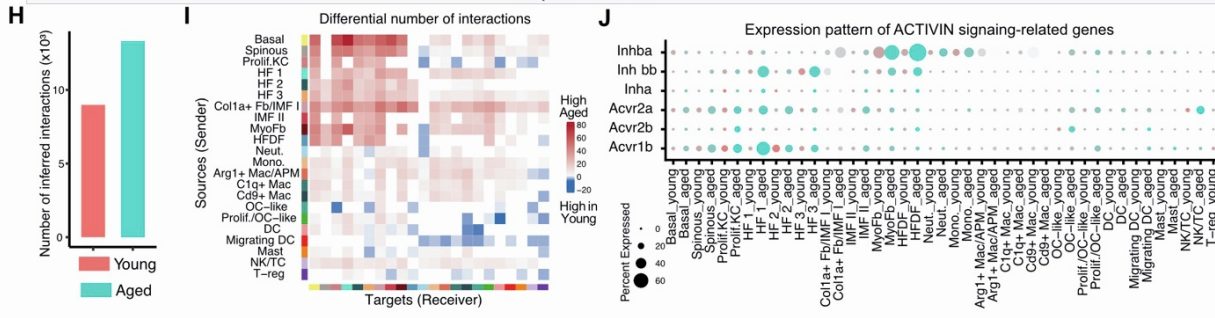

7dpw - v3

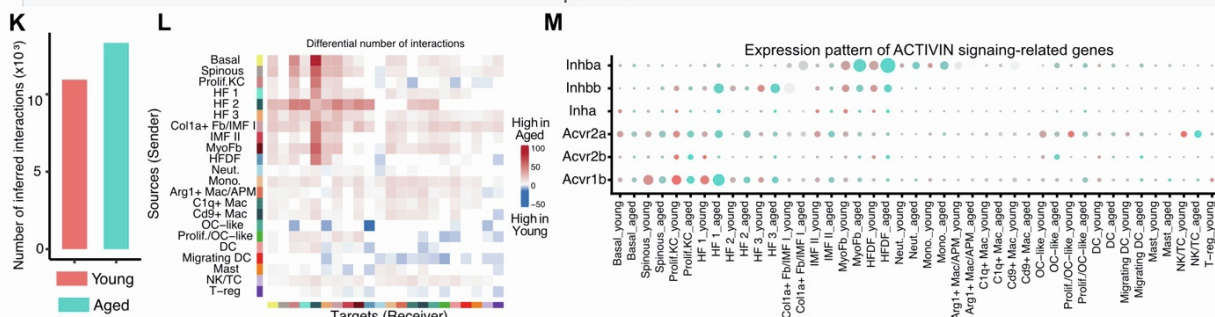

**Figure S6. Aging induces substantial changes in both structure and strength of putative cell-cell communications. Related to Figure 6.**

A-G: v3-only analysis using young and aged skin wound data at 4dpw.

- A. v3-only data corresponding to v2+v3 data in Figure 6A.
- B. v3-only data corresponding to v2+v3 data in Figure 6B.
- C. v3-only data corresponding to v2+v3 data in Figure 6C.
- D. v3-only data corresponding to v2+v3 data in Figure 6D.
- E. v3-only data corresponding to v2+v3 data in Figure 6F.
- F. v3-only data corresponding to v2+v3 data in Figure 6G.
- G. v3-only data corresponding to v2+v3 data in Figure 6H.

H-J: v2+v3 analysis for young and aged skin wounds at 7dpw. See Figure 6 legends for additional information.

- H. 7dpw data related to 4dpw data in Figure 6A.
- I. 7dpw data related to 4dpw data in Figure 6C.
- J. 7dpw data related to 4dpw data in Figure 6H.

K-M: v3-only data corresponding to v2+v3 data in (H-J) above.

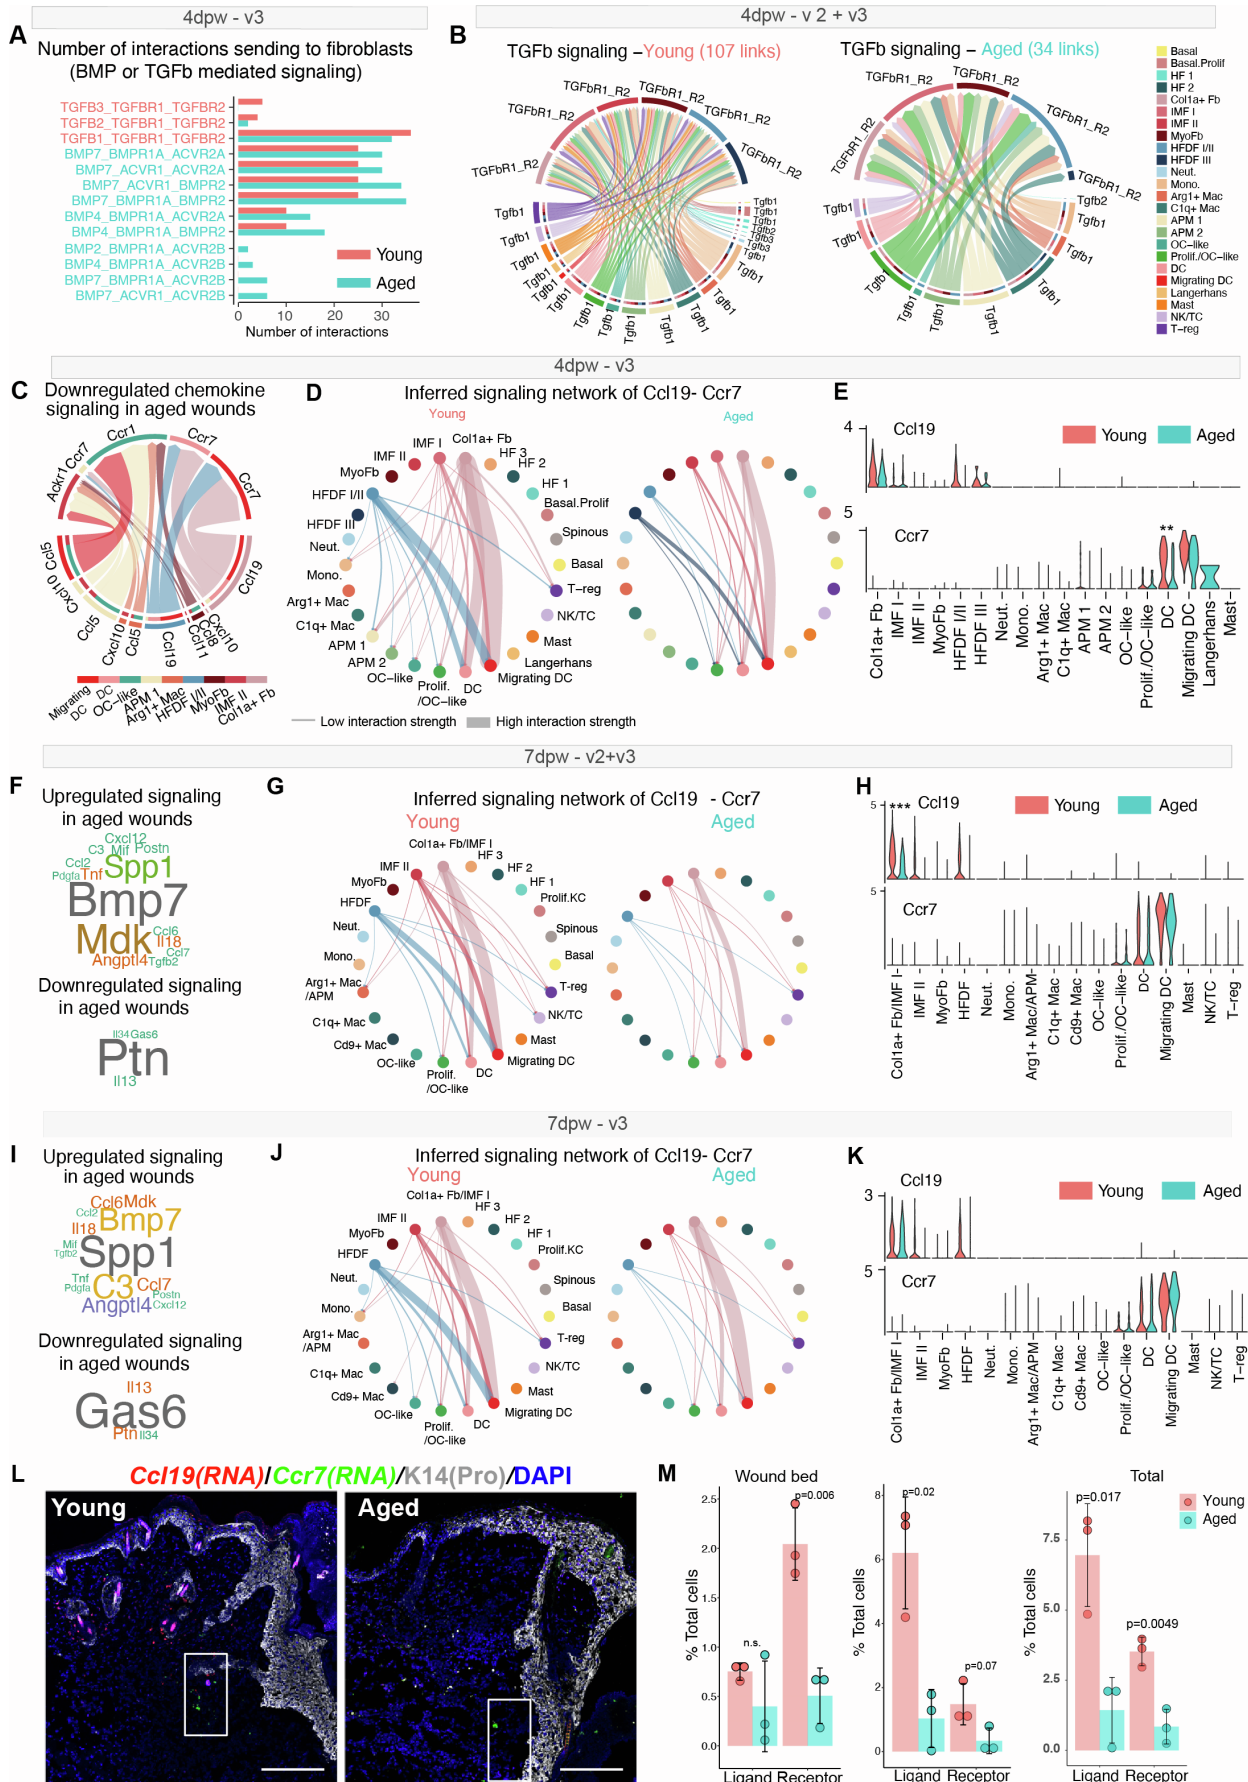



**Figure S7. Dysregulated signaling in aged skin wounds compared to young skin wounds.**

**Related to Figure 7.**

- A. v3-only data corresponding to v2+v3 data in Figure 7B.
- B. Inferred TGF- $\beta$ -mediated cell-cell communications from non-fibroblast subsets to fibroblast subsets in young (left) and aged (right) skin wounds at 4dpw using v2+v3 data. The number of putative interactions (i.e., links in the diagram) is indicated on the top.

C-E: v3-only analysis using young and aged skin wound data at 4dpw.

- C. v3-only data corresponding to v2+v3 data in Figure 7D.
- D. v3-only data corresponding to v2+v3 data in Figure 7E.
- E. v3-only data corresponding to v2+v3 data in Figure 7F.

F-H: v2+v3 analysis for young and aged skin wounds at 7dpw. See Figure 7 legends for additional information.

- F. 7dpw data related to 4dpw data in Figure 7A.
- G. 7dpw data related to 4dpw data in Figure 7E.
- H. 7dpw data related to 4dpw data in Figure 7F.

I-K: v3-only data corresponding to v2+v3 data in (F-H) above.

- L. Low-magnification images of additional RNAScope data showing spatial distribution of *Ccl19* and *Ccr7* transcripts in young and aged skin wounds (see high-magnification images in Figure 7G). DAPI stains the nuclei. Scale bar: 100  $\mu$ m.

- M. Quantification of *Ccl19*<sup>+</sup> cells and *Ccr7*<sup>+</sup> cells per total DAPI-stained nuclei in young and aged skin wound beds (n=3 pairs). Bar graphs represent mean $\pm$ SD.

*p*-values were calculated using Wilcoxon rank sum test (E, H) or unpaired two-tailed Student's *t*-test (M). \*\*\**p*<0.001, \*\* *p*<0.01.
